# Supplementary material for: Fluoro-functionalization of vinylene units in a polyarylenevinylene for polymer solar cells
Source: Royal Society of Chemistry journal article supplement (doi:10.1039/c2ta00177b), 2012-10-15
Supplement: c2ta00177b.pdf [file c2ta00177b.pdf]

## Supplementary data

### Fluoro-Functionalization of Vinylene Units in a Polyarylenevinylene for Polymer Solar Cells: Impact of Fluorination on Morphological and Optical Properties and on Photovoltaic Performances.

5 Antonio Cardone,<sup>a</sup> Carmela Martinelli,<sup>a</sup> Maria Losurdo,<sup>b</sup> Elena Dilonardo,<sup>b</sup> Giovanni Bruno,<sup>b</sup> Guido Scavia,<sup>c</sup> Silvia Destri,<sup>c</sup> Pinalysa Cosma,<sup>d</sup> Luigi Salamandra,<sup>e</sup> Andrea Reale,<sup>e</sup> Aldo Di Carlo,<sup>e</sup> Aranzazu Aguirre,<sup>f</sup> Begona Miliàn-Medina,<sup>f</sup> Johannes Gierschner,<sup>f</sup> Gianluca M. Farinola,<sup>\*d</sup>

<sup>a</sup> *Istituto di Chimica dei Composti OrganoMetallici (ICCOM) di Bari, Consiglio Nazionale delle Ricerche (CNR), Via Orabona, 4 – 70125 Bari, Italy. E-mail: [cardone@ba.iccom.cnr.it](mailto:cardone@ba.iccom.cnr.it);*

10 [mrcr01ch@uniba.it](mailto:mrcr01ch@uniba.it).

<sup>b</sup> *Istituto per le Metodologie Inorganiche e dei Plasmi (IMIP) di Bari, Consiglio Nazionale delle Ricerche (CNR), Via Orabona, 4 – 70125 Bari, Italy. E-mail: [maria.losurdo@ba.imip.cnr.it](mailto:maria.losurdo@ba.imip.cnr.it); [dlln01ch@uniba.it](mailto:dlln01ch@uniba.it); [giovanni.bruno@ba.imip.cnr.it](mailto:giovanni.bruno@ba.imip.cnr.it).*

<sup>c</sup> *Istituto per lo Studio delle Macromolecole (ISMAC), Consiglio Nazionale delle Ricerche (CNR), Via Bassini, 15 – 20133 Milano, Italy. E-mail: [scavia@ismac.cnr.it](mailto:scavia@ismac.cnr.it); [destri@ismac.cnr.it](mailto:destri@ismac.cnr.it).*

<sup>d</sup> *Dipartimento di Chimica, Università degli Studi di Bari “A. Moro”, Via Orabona, 4 – 70125 Bari, Italy. E-mail: [p.cosma@chimica.uniba.it](mailto:p.cosma@chimica.uniba.it); [gianlucamaria.farinola@uniba.it](mailto:gianlucamaria.farinola@uniba.it)*

<sup>e</sup> *Electronic Engineering Department, University of Rome Tor Vergata, Via del Politecnico, 1 – 00133 Rome, Italy. E-mail: [luigi.salamandra@uniroma2.it](mailto:luigi.salamandra@uniroma2.it); [reale@uniroma2.it](mailto:reale@uniroma2.it); [aldo.dicarlo@uniroma2.it](mailto:aldo.dicarlo@uniroma2.it).*

20<sup>f</sup> *Madrid Institute for Advanced Studies, IMDEA Nanoscience, Calle Faraday 9, Campus Cantoblanco 28049 Madrid, Spain. E-mail: [johannes.gierschner@imdea.org](mailto:johannes.gierschner@imdea.org); [begona.milian@imdea.org](mailto:begona.milian@imdea.org); [aranzazu.aguirre@imdea.org](mailto:aranzazu.aguirre@imdea.org).*

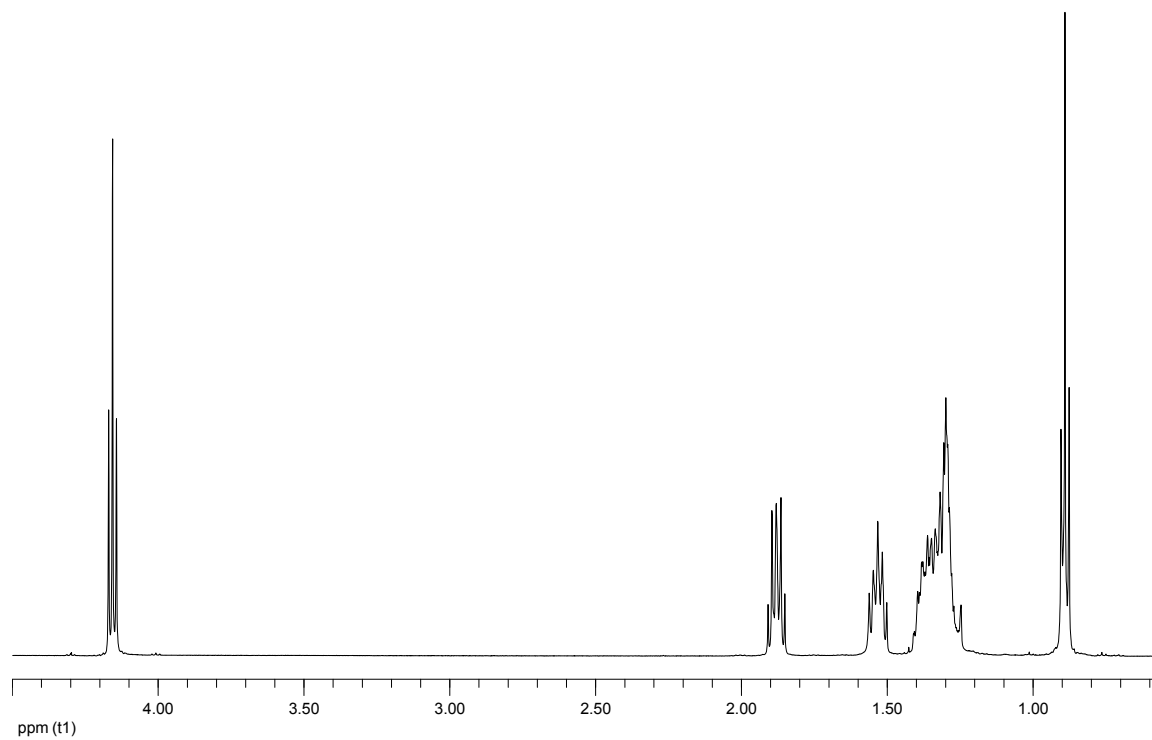

**Figure S1.** <sup>1</sup>H NMR spectrum of 4,7-dibromo-5,6-di-octyloxy-2,1,3-benzothiadiazole **4**.

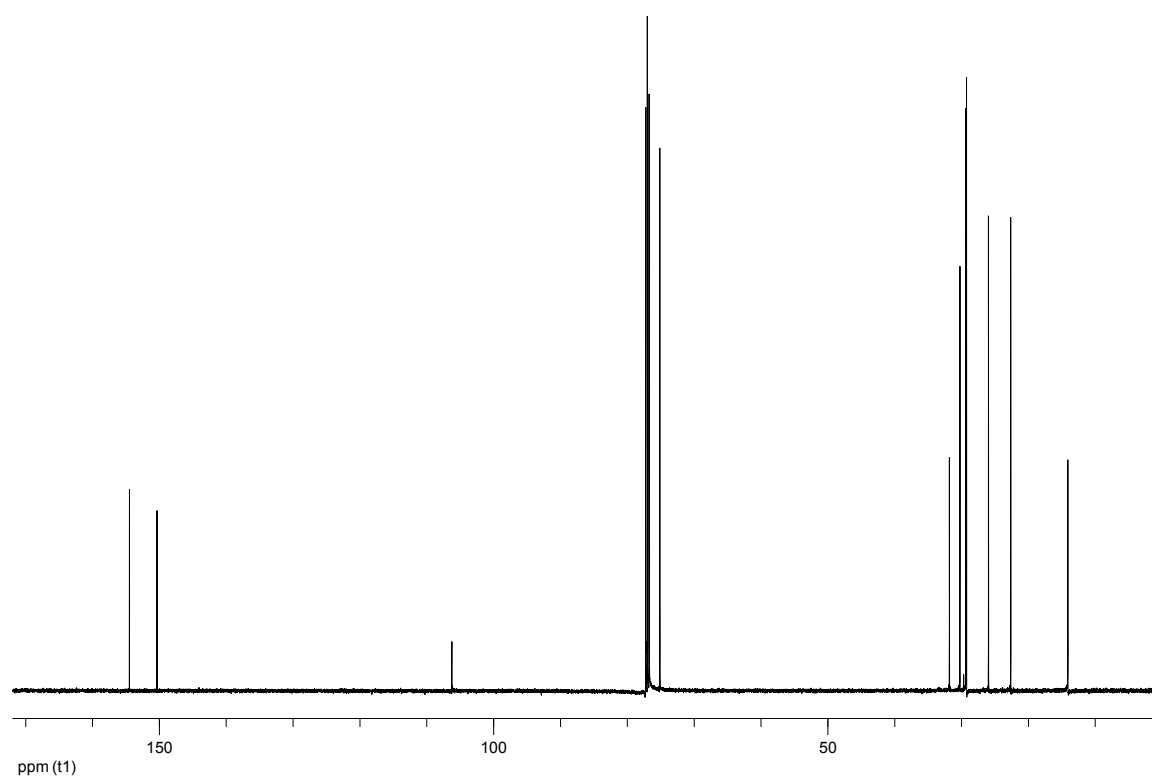

**Figure S2.** <sup>13</sup>C NMR spectrum of 4,7-dibromo-5,6-di-octyloxy-2,1,3-benzothiadiazole **4**.

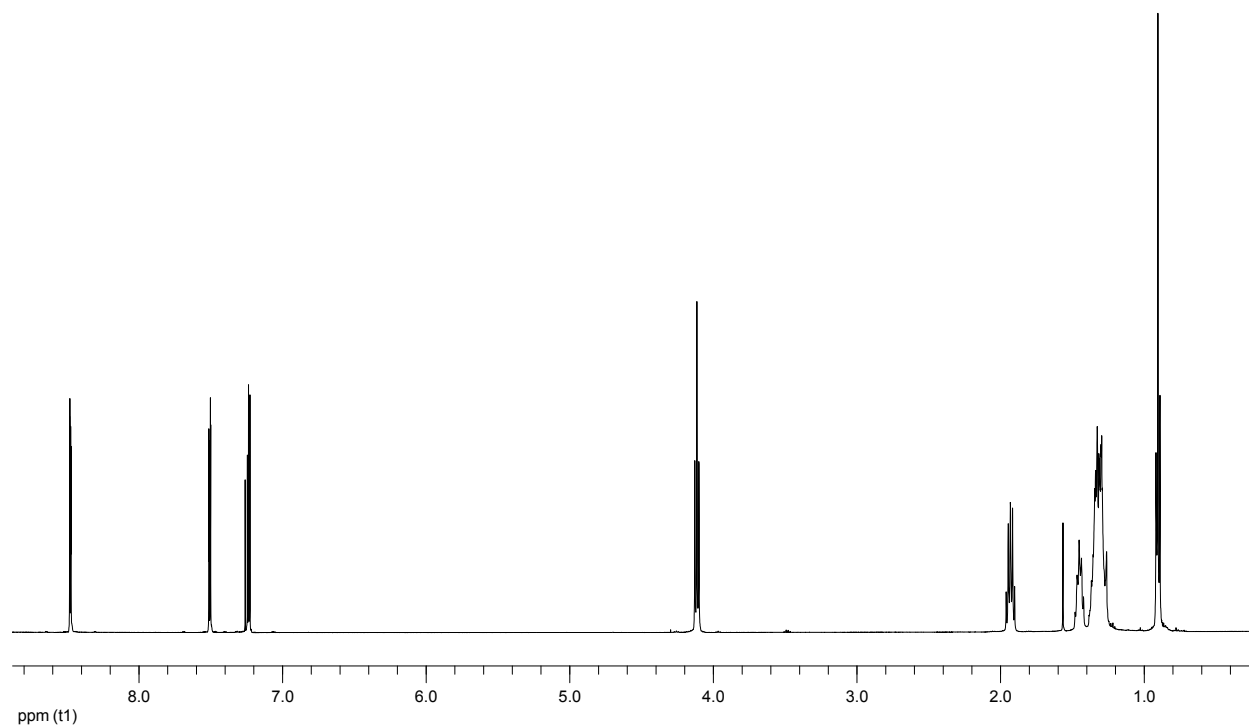

**Figure S3.**  $^1\text{H}$  NMR spectrum of 5,6-di-octyloxy-4,7-di-2'-thienyl-2,1,3-benzothiadiazole **5**.

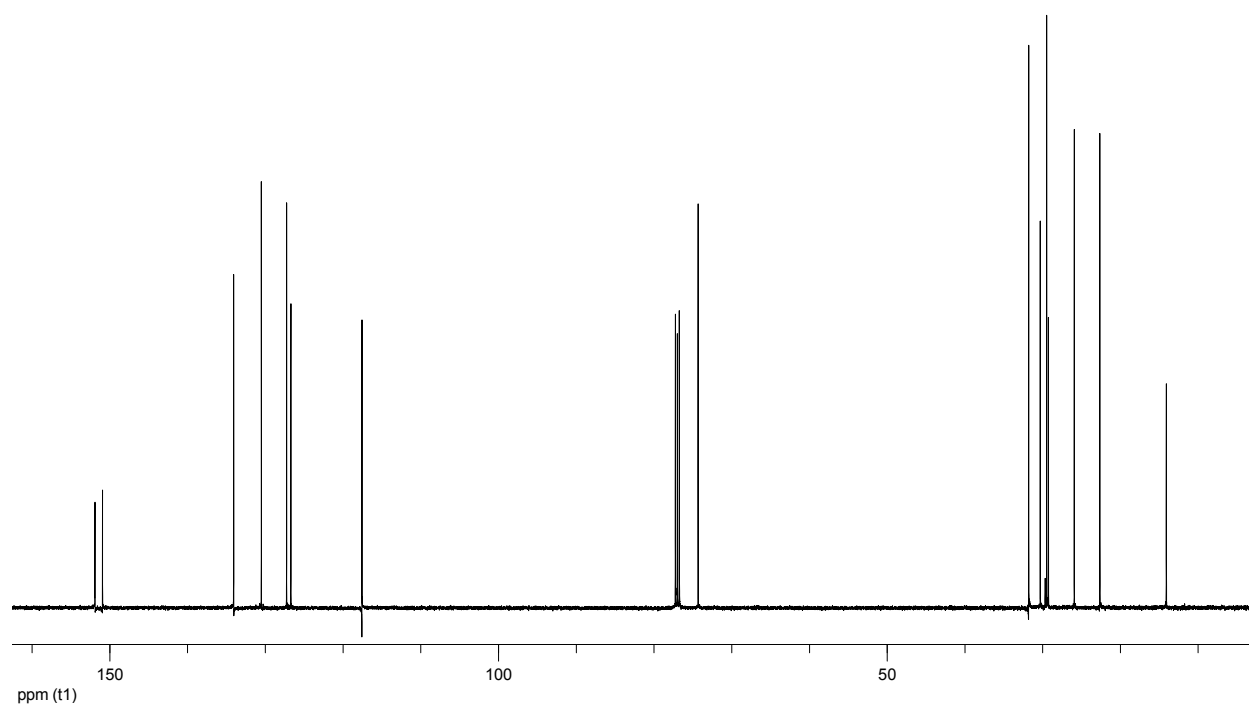

**Figure S4.**  $^{13}\text{C}$  NMR spectrum of 5,6-di-octyloxy-4,7-di-2'-thienyl-2,1,3-benzothiadiazole **5**.

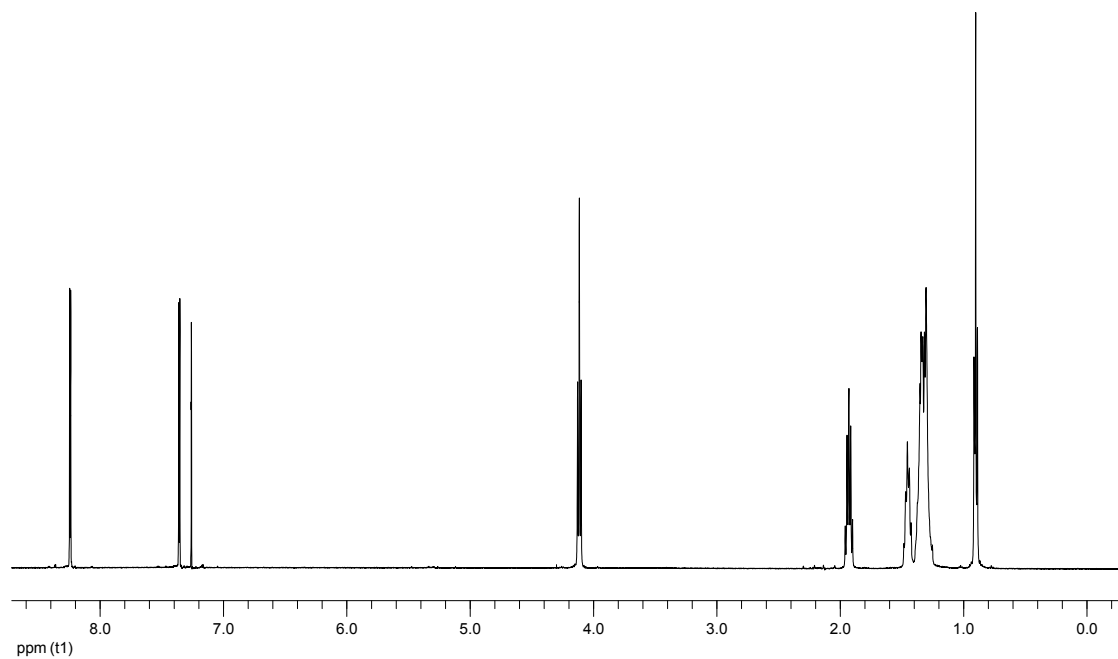

**Figure S5.** <sup>1</sup>H NMR spectrum of 4,7-di-(5'-iodothiophen-2'-yl)-5,6-di-octyloxy-2,1,3-benzothiadiazole **M3**.

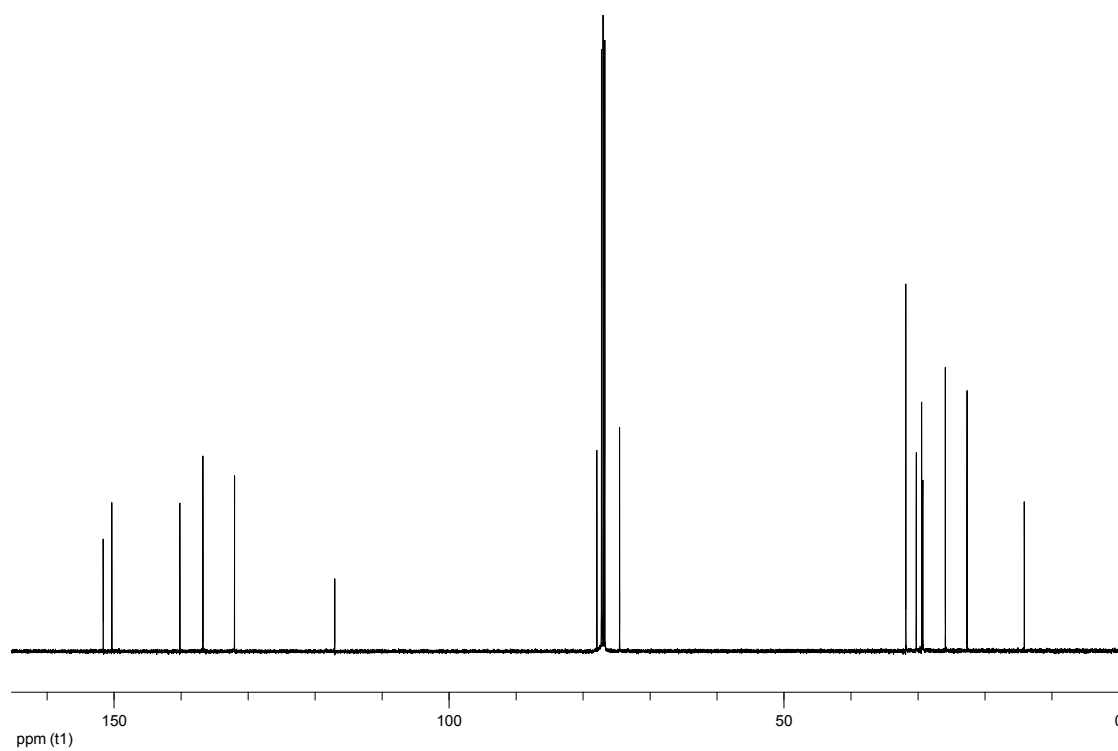

**Figure S6.** <sup>13</sup>C NMR spectrum 4,7-di-(5'-iodothiophen-2'-yl)-5,6-di-octyloxy-2,1,3-benzothiadiazole **M3**.

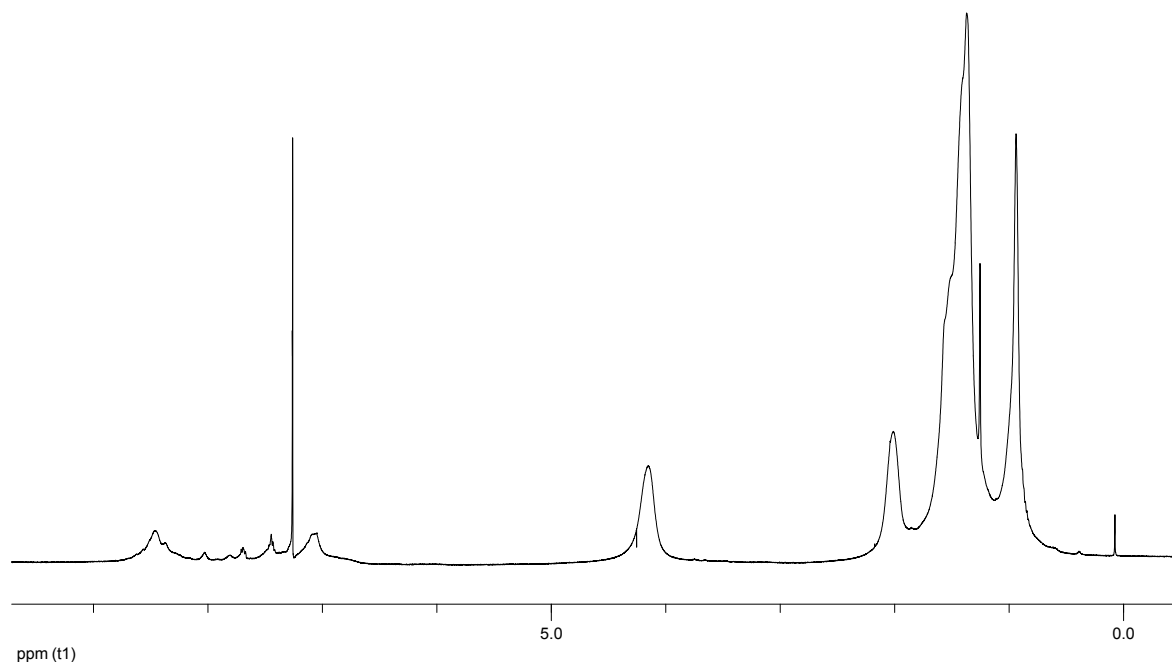

**Figure S7.** <sup>1</sup>H NMR spectrum of Poly[5,5-(5',6'-di-octyloxy-4',7'-di-2-thienyl-2',1',3'-benzothiadiazole)-alt-1'',2''-difluorovinylene] **PDTBTFV**.

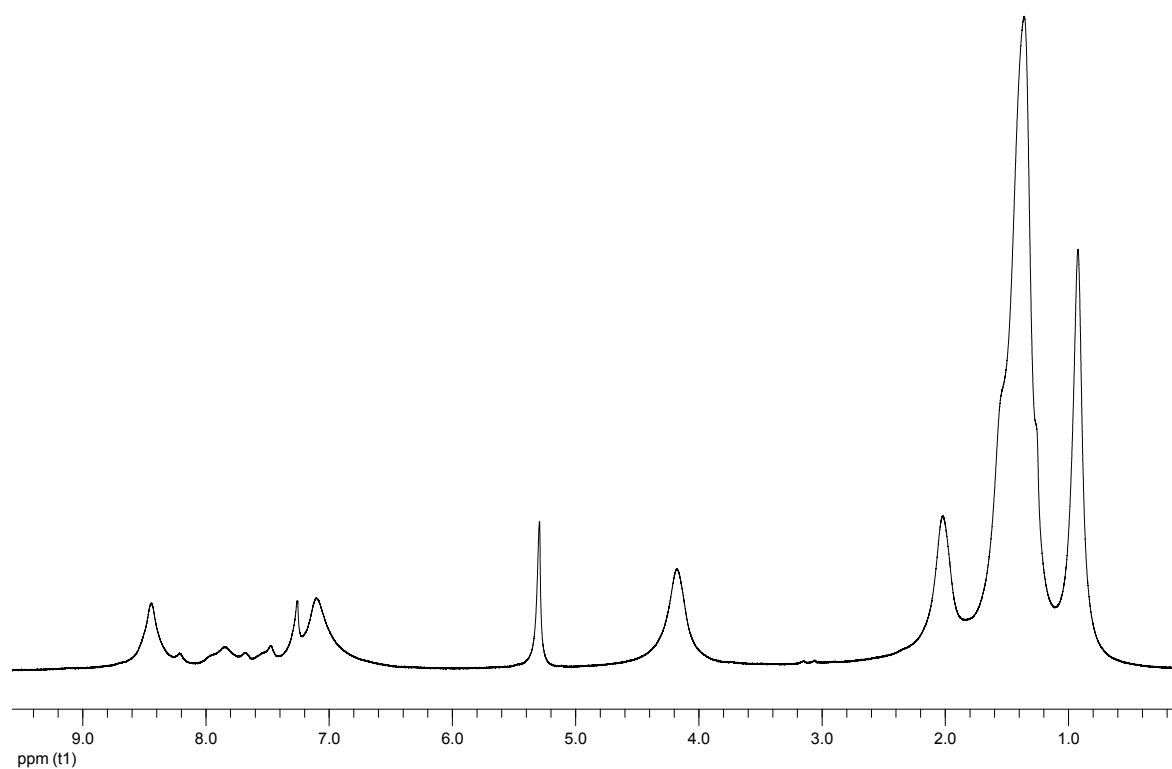

**Figure S8.** <sup>1</sup>H NMR spectrum Poly[5,5-(5',6'-di-octyloxy-4',7'-di-2-thienyl-2',1',3'-benzothiadiazole)-alt-1'',2''-vinylene] **PDTBTV**.

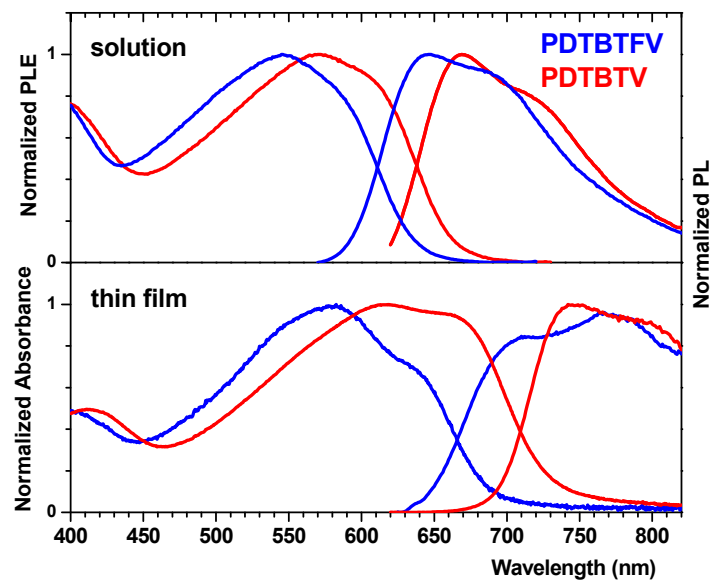

**Figure S9.** Absorbance and photoluminescence spectra of **PDTBTFV** and **PDTBTV** in solution and thin film.

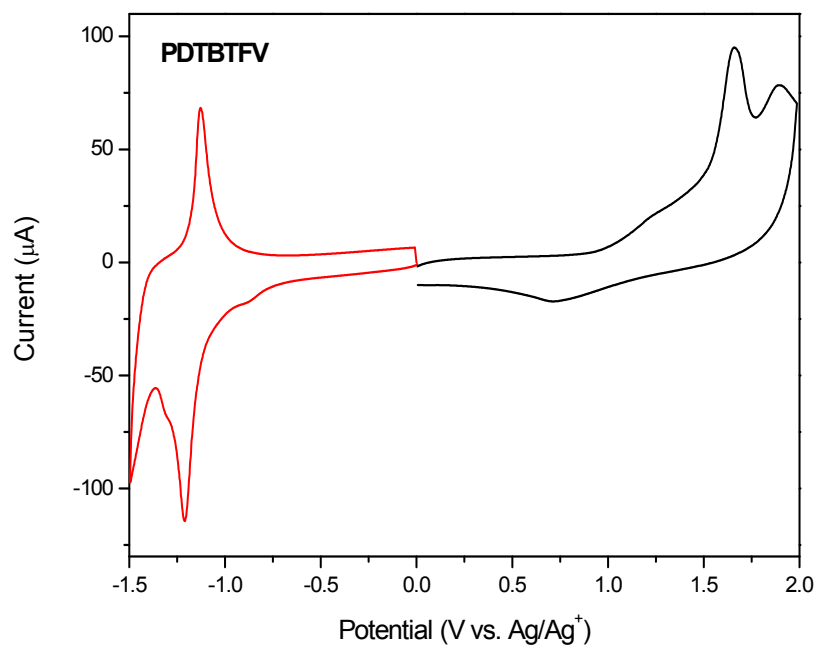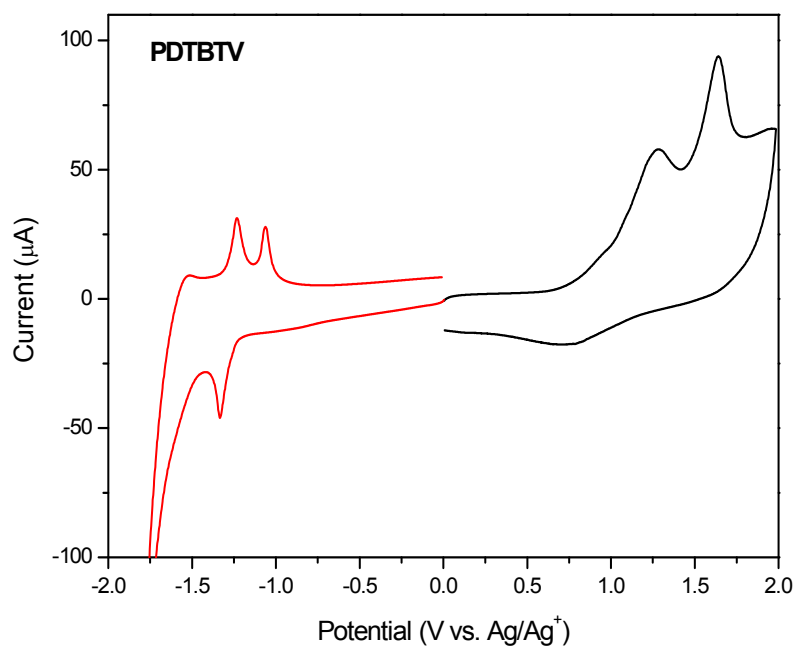

**Figure S10.** Cyclic Voltammetry of thin films of **PDTBTFV** and **PDTBTV** deposited onto ITO electrode and recorded in acetonitrile solution containing 0.1 M TBAPF<sub>6</sub> at a scan rate of 100 mV/s.

**Table S1.** Fitting parameters derived from the ellipsometric analysis of spectra of both fluorinated (**PDTBTFV**) and non-fluorinated (**PDTBTV**) polymer films (the samples refer to spectra in Fig. 10).  $n_{\infty}$  is the high frequency refractive index,  $\omega_j$ ,  $\gamma_j$  and  $f_j$  are the frequency, width and amplitude of the j-th.

| Polymer        | $n_{\infty}$ | $f_I$ | $\omega_I$ | $\gamma_I$ | $f_{II}$ | $\omega_{II}$ | $\gamma_{II}$ | $f_{III}$ | $\omega_{III}$ | $\gamma_{III}$ | $f_{IV}$ | $\omega_{IV}$ | $\gamma_{IV}$ | $f_V$ | $\omega_V$ | $\gamma_V$ |
|----------------|--------------|-------|------------|------------|----------|---------------|---------------|-----------|----------------|----------------|----------|---------------|---------------|-------|------------|------------|
| <b>PDTBTFV</b> | 1.49         | 0.053 | 2.25       | 0.39       | 0.002    | 3.14          | 0.253         | 0.004     | 3.60           | 0.45           | 0.002    | 4.68          | 0.40          | 0.028 | 6.10       | 1.39       |
|                | ±            | ±     | ±          | ±          | ±        | ±             | ±             | ±         | ±              | ±              | ±        | ±             | ±             | ±     | ±          | ±          |
|                | 0.01         | 0.013 | 0.01       | 0.01       | 0.002    | 0.02          | 0.061         | 0.002     | 0.08           | 0.09           | 0.001    | 0.05          | 0.12          | 0.005 | 0.01       | 0.12       |
| <b>PDTBTV</b>  | 1.47         | 1.40  | 2.05       | 0.27       | 0.002    | 3.10          | 0.209         | 0.004     | 3.72           | 0.49           | 0.0002   | 4.67          | 0.23          | 0.002 | 6.10       | 0.60       |
|                | ±            | ±     | ±          | ±          | ±        | ±             | ±             | ±         | ±              | ±              | ±        | ±             | ±             | ±     | ±          | ±          |
|                | 0.03         | 0.059 | 0.02       | 0.01       | 0.002    | 0.04          | 0.008         | 0.001     | 0.20           | 0.06           | 0.0001   | 0.20          | 0.08          | 0.001 | 0.10       | 0.02       |

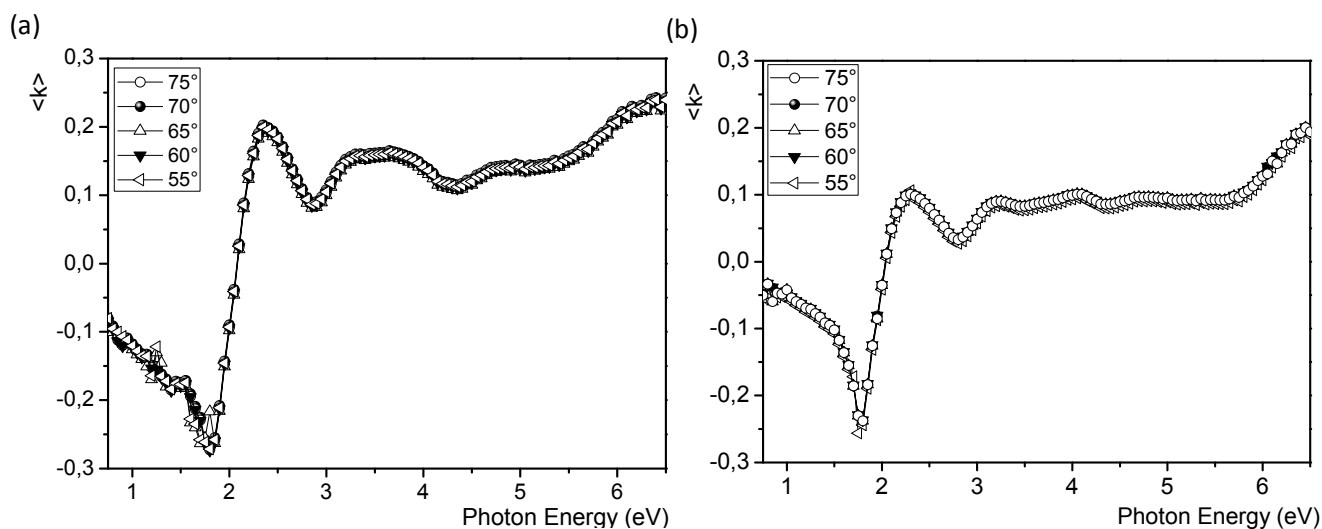

**Figure S11.** Experimental ellipsometric spectra, acquired at various angles of incidence in the range 55°-75°, of the pseudoextinction coefficient for (a) the fluorinated, **PDTBTFV**, and (b) non-fluorinated, **PDTBTV**, films of similar thickness of approximately 15 nm.
